# Supplementary material for: A discriminator code–based DTD surveillance ensures faithful glycine delivery for protein biosynthesis in bacteria
Source: eLife. 2018 Aug 9;7:e38232. doi: 10.7554/eLife.38232 (PMC6097841; doi:10.7554/eLife.38232)
Supplement: Figure 2—source data 1. [file elife-38232-fig2-data1.xlsx]

## Sheet: Fig2a
Gly-tRNA(Gly) wild type
EcDTD
Data Set 1
Time (min)	Buffer	EcDTD(10nM)	EcDTD(100pM)			Average
0	100	100	100			Time (min)	Buffer	EcDTD(10nM)	EcDTD(100pM)
1	102.728	81.6792	102.573			0	100	100	100
2	101.296	58.8508	100.406			1	99.2365	72.85	98.4217
3	99.1875	35.3066	99.0714			2	97.5714	41.7755	97.108
4	98.3556	31.5728	96.7692			3	96.0405	25.8546	94.8259
5	95.0281	22.2287	94.3896			4	95.4027	20.5684	92.224
6	93.3643	19.2107	89.0695			5	92.8099	16.1368	89.2959
						6	90.9388	14.2248	85.1785
Data Set 2						Standard Deviation
Time	Buffer	EcDTD(10nM)	EcDTD(100pM)			Time (min)	Buffer	EcDTD(10nM)	EcDTD(100pM)
0	100	100	100			0	0	0	0
1	97.8319	83.4617	93.7287			1	3.04273	16.8599	4.44696
2	96.0939	43.4689	93.7646			2	3.24863	17.982	3.32109
3	94.3738	21.8957	90.7543			3	2.72692	8.22159	4.16125
4	93.46	14.3164	89.0521			4	2.59941	9.55957	4.03766
5	90.611	12.005	84.5727			5	2.20859	5.38632	4.91896
6	87.7979	9.13815	81.885			6	2.85133	5.03702	3.6293
Data Set 3
Time (min)	Buffer	EcDTD(10nM)	EcDTD (100 pM)
0	100	100	100
1	97.1498	53.4091	98.9633
2	95.3241	23.0067	97.1532
3	94.5604	20.3614	94.652
4	94.3927	15.8159	90.8507
5	92.7906	14.1766	88.9255
6	91.6542	14.3256	84.5812

## Sheet: Fig2b
Gly-tRNA(Gly) U73C
EcDTD
Data set 1							Mean
Time	Buffer	EcDTD(10nM)	EcDTD(100pM)				Time	Buffer	EcDTD(10nM)	EcDTD(100pM)
0	100	100	100				0	100	100	100
1	95.1331	58.7885	93.7325				1	98.3816	56.5087	100.487
2	93.3473	29.902	89.8109				2	97.4673	24.8123	94.6618
3	89.2857	21.9188	85.5742				3	93.9798	17.6506	92.9876
4	89.1457	12.3599	84.2787				4	90.2866	10.939	86.9374
5	89.5308	11.0294	84.8389				5	88.0285	7.39993	84.7905
6	89.3557	10.2241	78.6765				6	87.2712	8.53313	81.0918
Data set 2							Standard deviation
Time	Buffer	EcDTD(10nM)	EcDTD(100pM)				Time	Buffer	EcDTD(10nM)	EcDTD(100pM)
0	100	100	100				0	0	0	0
1	100.634	70.0373	101.269				1	2.88267	14.8007	6.39925
2	102.09	30.4104	89.7388				2	4.3927	9.25939	8.46457
3	97.0896	20.4104	92.6493				3	4.13614	6.13299	7.58819
4	90.8582	12.0522	84.6269				4	0.988114	2.20014	4.30699
5	88.1343	7.20149	81.8284				5	1.55799	3.53445	2.93826
6	85.1866	6.23134	78.9179				6	2.94805	2.06527	3.97616
Data set 3
Time (min)	Buffer	EcDTD(10nM)	EcDTD(100pM)
0	100	100	100
1	99.3774	40.7004	106.459
2	96.965	14.1245	104.436
3	95.5642	10.6226	100.739
4	90.856	8.40467	91.9066
5	86.4202	3.96887	87.7043
6	-	9.14397	85.6809

## Sheet: Fig2c
Gly-tRNA(Gly) U73A
EcDTD
Data Set 1								Mean
Time (min)	Buffer	EcDTD(10nM)	EcDTD-100pM					Time (min)	Buffer	EcDTD(10nM)	EcDTD-100pM
0	100	100	100					0	100	100	100
1	92.5704	12.2002	71.8196					1	97.0417	7.8458	66.5771
2	79.9791	1.98123	47.3149					2	94.5349	2.65441	39.4712
3	82.8728	1.43379	19.6559					3	94.1783	2.75924	27.2693
4	86.8613	1.53806	6.96038					4	93.1702	2.95426	15.3119
5	83.4202	1.90302	4.35349					5	89.4637	3.45132	13.5417
6	77.6851	2.4244	6.25652					6	85.055	3.95624	12.2089
Data Set 2
Time	Buffer	EcDTD(10nM)	EcDTD(100pM)					Standard Deviation
0	100	100	100					Time (min)	Buffer	EcDTD(10nM)	EcDTD-100pM
1	100.775	6.17054	57.4264					0	0	0	0
2	106.264	4.52713	19.1938					1	3.59387	3.64401	7.54804
3	108.31	5.45736	13.1163					2	10.858	1.24997	16.6453
4	103.845	6.51163	0.806202					3	10.5643	1.82642	15.9708
5	97.6124	7.65891	9.39535					4	7.40134	2.39307	15.8138
6	92.093	7.93798	9.11628					5	5.98221	2.82709	10.2206
								6	5.88588	2.67322	7.2185
Data Set 3
Time	Buffer	EcDTD(10nM)	EcDTD(100pM)
0	100	100	100
1	95.9034	9.19696	63.4292
2	96.3104	2.11612	33.8307
3	91.4813	1.95334	26.5328
4	90.2604	1.54639	16.522
5	87.3576	1.70917	12.3711
6	85.1058	2.38741	10.7976
Data set 4
Time (min)	Buffer	EcDTD(10nM)	EcDTD(100pM)
0	100	100	100
1	98.918	3.81549	73.6333
2	95.5866	1.99317	57.5456
3	94.049	2.19248	49.7722
4	91.7141	2.22096	36.959
5	89.4647	2.53417	28.0467
6	85.336	3.07517	22.6651

## Sheet: Fig2d
Gly-tRNA(Gly) U73G
EcDTD
Data Set 1							Mean
Time	Buffer	EcDTD(10nM)	EcDTD(100pM)				Time	Buffer	EcDTD(10nM)	EcDTD(100pM)
0	100	100	100				0	100	100	100
1	99.757	7.75519	63.4335				1	96.7016	8.2675	63.6504
2	98.4755	3.42466	42.2227				2	93.2571	4.34683	50.2542
3	95.9567	3.38047	34.0256				3	90.5194	3.71987	41.0072
4	95.5148	3.60141	25.3646				4	88.4305	3.80527	32.8015
5	91.2506	2.54087	17.8524				5	84.7462	3.36863	26.1106
6	87.2072	3.53513	16.1732				6	81.5797	2.36933	22.9695
Data Set 2							Standard Deviation
Time	Buffer	EcDTD(10nM)	EcDTD(100pM)				Time	Buffer	EcDTD(10nM)	EcDTD(100pM)
0	100	100	100				0	0	0	0
1	93.4451	9.71416	67.6553				1	3.16074	1.2705	3.901
2	87.6854	2.34257	61.6377				2	5.40373	2.59148	10.1322
3	84.6766	1.07458	52.0309				3	5.65099	2.83031	9.65932
4	81.6892	0.451322	40.8339				4	6.91916	3.46038	7.75183
5	77.3479	1.0101	33.8706				5	6.99427	2.86359	8.02072
6	74.3176	1.20352	29.7657				6	6.59842	1.64869	9.61136
Data Set 3
Time (min)	Buffer	EcDTD C-His(10nM)	EcDTD C-His(100pM)
0	100	100	100
1	96.9028	7.33313	59.8623
2	93.6106	7.27327	46.9021
3	90.9248	6.70458	36.965
4	88.0875	7.36306	32.2059
5	85.64	6.55492	26.6088
6	83.2142	-	-

## Sheet: Fig2e
Gly-tRNA(Gly) U73A/C70U
EcDTD
Data set 1						Mean
Time (min)	Buffer	EcDTD (10 pM)	EcDTD (100 pM)			Time (min)	Buffer	EcDTD (10 pM)	EcDTD (100 pM)
0	100	100	100			0	100	100	100
1	95.06	50.8998	15.1729			1	98.653	69.5337	12.6623
2	89.2908	45.2011	4.7283			2	91.8702	55.2685	5.69213
3	84.9153	34.1567	3.28158			3	90.6999	40.8542	3.89083
4	83.645	26.6055	2.84051			4	90.5472	35.1936	3.81946
5	80.9104	18.1898	3.3698			5	84.5672	24.5713	3.02128
6	75.7586	10.7445	4.51658			6	85.0047	21.0924	4.79829
Data set 2
Time (min)	Buffer	EcDTD 10 pM	EcDTD 100 pM			Standard deviation
0	100	100	100			Time (min)	Buffer	EcDTD (10 pM)	EcDTD (100 pM)
1	97.9409	72.8375	12.4799			0	0	0	0
2	89.7583	54.4116	6.37422			1	3.99693	17.2213	2.42449
3	89.7583	35.9856	4.52999			2	4.06961	10.5221	0.858368
4	88.3617	30.2238	4.31513			3	6.30829	10.0582	0.624742
5	85.3536	23.1191	2.52462			4	8.216	11.88	0.847816
6	84.4226	21.2419	7.05461			5	3.33391	7.21794	0.441633
						6	9.55044	10.274	2.12949
Data set 3
Time (min)	Buffer	EcDTD 10 pM	EcDTD 100 pM
0	100	100	100
1	102.958	84.8636	10.3342
2	96.5617	66.1929	5.97388
3	97.426	52.4203	3.86093
4	99.635	48.7514	4.30273
5	87.4376	32.4049	3.16942
6	94.8329	31.2908	2.82367

## Sheet: Fig2f
Gly-tRNA(Ala)
EcDTD
Data Set 1						Mean
Time (min)	Buffer	EcDTD (10 pM)	EcDTD (100 pM)			Time (min)	Buffer	EcDTD (10 pM)	EcDTD (100 pM)
0	100	100	100			0	100	100	100
1	98.601	75.5604	2.51138			1	99.0547	67.3551	16.5315
2	92.8535	59.5989	2.0563			2	93.0507	50.9523	8.67854
3	91.2692	38.9348	2.67993			3	92.8237	35.895	2.98681
4	86.2633	25.2655	2.25855			4	87.7337	24.8325	3.48368
5	84.7969	16.5683	2.69678			5	84.4906	19.9038	2.91051
6	84.8475	9.84325	4.01146			6	82.21	15.2108	4.09182
Data Set 2						Standard Deviation
Time (min)	Buffer	EcDTD 10 pM	EcDTD 100 pM			Time (min)	Buffer	EcDTD (10 pM)	EcDTD (100 pM)
0	100	100	100			0	0	0	0
1	98.5454	62.0925	4.25868			1	0.834359	7.20004	22.7872
2	92.5166	37.0838	6.58955			2	0.655228	12.1319	7.8773
3	96.9331	31.1777	3.47003			3	3.59382	4.14167	0.423543
4	91.7631	9.3761	4.62671			4	3.53171	15.2445	1.18621
5	87.2766	6.62461	3.39993			5	2.95112	15.2235	0.424982
6	82.5096	4.0659	4.08342			6	2.79939	14.589	0.0848678
Data Set 3
Time (min)	Buffer	EcDTD 10 pM	EcDTD 100 pM
0	100	100	100
1	100.018	64.4124	42.8245
2	93.7818	56.1742	17.3898
3	90.2688	37.5725	2.81047
4	85.1748	39.856	3.56578
5	81.3982	36.5185	2.63481
6	79.2728	31.7232	4.18057
