# Supplementary material for: A discriminator code–based DTD surveillance ensures faithful glycine delivery for protein biosynthesis in bacteria
Source: eLife. 2018 Aug 9;7:e38232. doi: 10.7554/eLife.38232 (PMC6097841; doi:10.7554/eLife.38232)
Supplement: Figure 3—source data 1. [file elife-38232-fig3-data1.xlsx]

## Sheet: Fig3a
Gly-tRNA(Gly) wildtype
EcDTD
Data Set 1									Mean
Time (min)	Buffer	EcDTD-10 nM	EcDTD-100 nM	Buffer+EF-Tu	EcDTD-10 nM + EF-Tu	EcDTD-100 nM + EF-Tu			Time (min)	Buffer	EcDTD-10 nM	EcDTD-100 nM	Buffer+EF-Tu	EcDTD-10 nM + EF-Tu	EcDTD-100 nM + EF-Tu
0	100	100	100	100	100	100			0	100	100	100	100	100	100
2	93.6081	68.2967	59.4139	103.298	96.1041	34.3491			2	94.2048	67.3186	26.9009	100.35	89.2961	34.4034
5	85.7692	59.5604	7.30769	101.389	86.0174	16.8756			5	83.7652	50.3442	6.76023	98.9108	84.9991	28.3192
10	71.3919	38.2967	3.95604	99.1514	75.0434	7.79171			10	70.8721	35.9211	3.0838	96.6906	80.6055	21.6973
15	57.6557	23.37	5.40293	94.3105	62.8544	4.89875			15	59.463	22.0492	3.9743	95.2414	76.1755	14.2744
Data Set 2									Standard deviation
Time (min)	Buffer	EcDTD-10 nM	EcDTD-100 nM	Buffer+EF-Tu	EcDTD-10 nM + EF-Tu	EcDTD-100 nM + EF-Tu			Time (min)	Buffer	EcDTD-10 nM	EcDTD-100 nM	Buffer+EF-Tu	EcDTD-10 nM + EF-Tu	EcDTD-100 nM + EF-Tu
0	100	100	100	100	100	100			0	0	0	0	0	0	0
2	97.2233	57.3032	28.3188	100.671	88.7418	30.7633			2	6.99583	5.8267	19.8934	3.54492	4.32942	4.87852
5	83.8532	52.6246	12.6094	98.0437	88.8186	38.3774			5	3.539	12.5998	3.82724	3.12102	2.71715	8.13204
10	72.2898	50.0571	5.3062	95.8381	90.1995	24.7219			10	4.65061	10.1715	1.49633	1.8881	6.32113	9.25319
15	59.4713	37.2955	5.95283	96.2984	84.9636	2.6659			15	5.05759	10.4675	1.64032	3.92743	9.85155	10.3756
Data Set 3
Time (min)	Buffer	EcDTD-10 nM	EcDTD-100 nM	Buffer+EF-Tu	EcDTD-10 nM + EF-Tu	EcDTD-100 nM + EF-Tu
0	100	100	100	100	100	100
2	102.892	70.6328	10.3455	94.4876	86.6266	31.5217
5	88.0823	54.7554	5.51242	94.4682	81.58	24.4177
10	77.5039	34.3168	2.09627	94.5846	76.184	22.8455
15	67.9736	23.913	2.9309	99.8835	74.4759	15.4115
Data Set 4
Time (min)	Buffer	EcDTD-10 nM	EcDTD-100 nM	Buffer+EF-Tu	EcDTD-10 nM + EF-Tu	EcDTD-100 nM + EF-Tu
0	100	100	100	100	100	100
2	93.6065	72.0742	25.2434	103.014	84.7866	32.5915
5	82.4178	56.513	6.33842	102.367	83.512	32.2274
10	65.2581	35.3482	1.85559	95.7313	83.7346	33.3198
15	54.6757	16.7555	3.47235	89.1968	86.7489	26.401
Data Set 5
Time (min)	Buffer	EcDTD-10 nM	EcDTD-100 nM	Buffer+EF-Tu	EcDTD-10 nM + EF-Tu	EcDTD-100 nM + EF-Tu
0	100	100	100	100	100	100
2	83.6942	68.2862	11.183	100.279	90.2215	42.7915
5	78.7035	28.2678	2.03327	98.2867	85.0676	29.6977
10	67.9166	21.587	2.20491	98.1474	77.866	19.8078
15	57.5389	8.91207	2.11249	96.5176	71.8345	21.9947

## Sheet: Fig3b
Gly-tRNA(Gly) U73A
EcDTD
Data Set 1										Mean
Time (min)	Buffer	EcDTD-100 pM	EcDTD-1 nM	Buffer+EF-Tu	EcDTD-100 pM + EF-Tu	EcDTD-1 nM + EF-Tu				Time (min)	Buffer	EcDTD-100 pM	EcDTD-1 nM	Buffer+EF-Tu	EcDTD-100 pM + EF-Tu	EcDTD-1 nM + EF-Tu
0	100	100	100	100	100	100				0	100	100	100	100	100	100
2	103.33	94.3584	3.03287	98.1653	105.018	55.0177				2	95.8936	78.0275	8.62364	103.577	96.5104	36.0987
5	98.2821	77.2641	1.6755	98.1432	104.553	22.6127				5	89.8305	54.8995	1.5912	102.801	95.0302	22.3034
10	90.7105	54.6978	0.678685	99.8232	100.995	5.70292				10	74.6911	31.6065	0.698292	103.507	95.1475	14.9326
15	76.0551	36.1188	1.63309	104.288	95.8002	3.0725				15	64.5342	17.707	1.12055	103.365	95.609	16.4924
Data Set 2										Standard Deviation
Time (min)	Buffer	EcDTD-100 pM	EcDTD-1 nM	Buffer+EF-Tu	EcDTD-100 pM + EF-Tu	EcDTD-1 nM + EF-Tu				Time (min)	Buffer	EcDTD-100 pM	EcDTD-1 nM	Buffer+EF-Tu	EcDTD-100 pM + EF-Tu	EcDTD-1 nM + EF-Tu
0	100	100	100	100	100	100				0	0	0	0	0	0	0
2	97.1011	73.5558	19.1449	99.0773	92.6406	56.1072				2	4.69876	9.20382	7.11188	10.0901	5.56406	17.7966
5	91.6371	49.2596	2.18978	101.406	97.232	33.8093				5	5.66946	15.3396	0.540054	5.94505	6.92233	8.27779
10	74.2857	31.4494	1.16788	101.516	95.3866	24.2531				10	9.23109	13.9358	0.353385	6.0297	7.70679	9.09166
15	64.1919	17.7059	1.83525	104.504	93.6731	16.8278				15	6.78594	11.0329	0.650831	4.971	8.03061	18.3013
Data Set 3
Time (min)	Buffer	EcDTD-100 pM	EcDTD-1 nM	Buffer+EF-Tu	EcDTD-100 pM + EF-Tu	EcDTD-1 nM + EF-Tu
0	100	100	100	100	100	100
2	92.8484	73.2734	2.92195	100.954	99.3253	23.6854
5	84.6547	60.3801	1.45076	102.862	93.6017	16.5658
10	70.1471	25.2758	0.858194	100.186	92.6477	17.543
15	62.7503	12.6481	1.04209	102.769	103.397	12.5174
Data Set 4
Time (min)	Buffer	EcDTD-100 pM	EcDTD-1 nM	Buffer+EF-Tu	EcDTD-100 pM + EF-Tu	EcDTD-1 nM + EF-Tu
0	100	100	100	100	100	100
2	91.2759	75.9416	12.721	121.512	92.1538	21.616
5	84.6272	51.9408	1.88317	112.86	94.4141	25.9808
10	68.1207	29.0354	0.57648	114.186	103.118	22.1876
15	58.4166	15.1038	0.903151	109.535	101.949	47.363
Data Set5
Time (min)	Buffer	EcDTD-100 pM	EcDTD-1 nM	Buffer+EF-Tu	EcDTD-100 pM + EF-Tu	EcDTD-1 nM + EF-Tu
0	100	100	100	100	100	100
2	94.9128	73.0082	5.29746	98.1767	93.4148	24.0669
5	89.9517	35.6527	0.756779	98.7344	85.3496	12.5483
10	70.1913	17.5741	0.210217	101.823	83.5907	4.9764
15	61.2571	6.95817	0.189195	95.7314	83.2261	2.68125

## Sheet: Fig3c
Gly-(Mm)tRNA(Gly)
MmDTD
Data set1						Mean
Time (min)	Buffer	1 nM	10 nM	100 nM		Time (min)	Buffer	1 nM	10 nM	100 nM
0	100	100	100	100		0	100	100	100	100
1	94.6526	99.6306	87.2296	57.2735		1	95.2276	96.2843	84.8872	48.5119
2	91.5567	94.0193	86.9129	44.7493		2	89.9839	92.5728	82.9321	39.6087
3	87.898	93.0695	83.6236	31.9789		3	87.7294	89.3734	77.2923	26.7128
4	83.3421	87.511	71.6623	36.3061		4	87.7294	86.5867	71.5218	23.1202
5	83.9226	79.6482	66.3676	20.5981		5	87.7294	79.9266	64.9317	15.724
6		83.5356	61.7062	15.5497		6	87.7294	78.6241	59.7721	13.6126
Data set 2						Standard deviation
Time (min)	Buffer	1 nM	10 nM	100 nM		Time (min)	Buffer	1 nM	10 nM	100 nM
0	100	100	100	100		0	0	0	0	0
1	94.2963	93.942	86.6352	47.975		1	1.31661	2.97423	3.55478	8.50584
2	89.0651	92.6595	84.6946	33.3108		2	1.36856	1.49173	5.09603	5.80641
3	85.9264	89.7908	78.4003	25.1772		3	1.72492	3.92148	6.95186	4.69079
4	81.134	85.7408	74.4009	17.921		4	2.91916	0.8877	2.95196	11.5041
5	76.5609	82.6865	67.381	14.0567		5	3.68638	2.63166	3.40263	4.29072
6	76.1897	78.6534	61.7449	13.0105		6	1.35941	4.92622	3.3835	1.7171
Data set 3
Time (min)	Buffer	1 nM	10 nM	100 nM
0	100	100	100	100
1	96.7339	95.2804	80.7969	40.2873
2	89.3297	91.0397	77.1888	40.7661
3	89.3639	85.2599	69.8529	22.9822
4	86.9186	86.5082	68.5021	15.1334
5	80.5917	77.4453	61.0465	12.5171
6	78.1122	73.6833	55.8653	12.2777

## Sheet: Fig3d
Gly-(Mm)tRNA(Ala)
MmDTD
Data set 1						Mean
Time (min)	Buffer	1nM	10nM	100nM		Time (min)	Buffer	1nM	10nM	100nM
0	100	100	100	100		0	100	100	100	100
1	95.364	83.0268	60.6897	6.72414		1	91.8341	81.1996	59.0027	8.85315
2	92.9119	76.6092	48.6782	2.81609		2	85.1724	79.1311	48.0392	3.50956
3	87.2605	70.728	43.2759	1.99234		3	81.9541	74.0634	36.9454	2.23243
4	85.3065	55.2299	33.908	1.91571		4	76.4407	63.4455	28.7467	2.2983
5	80.1533	61.1686	27.7011	1.91571		5	72.2942	62.2213	22.6939	1.97759
6	74.3295	55.7663	26.5326	1.7433		6	66.8507	57.5473	19.0723	2.11434
						Standard deviation
Data set 2						Time (min)	Buffer	1nM	10nM	100nM
Time (min)	Buffer	1nM	10nM	100nM		0	0	0	0	0
0	100	100	100	100		1	3.69267	6.38666	1.72269	2.28639
1	87.9977	74.0984	59.0721	11.2697		2	7.04466	4.41167	1.60834	0.650513
2	83.4711	76.559	49.2299	3.60631		3	4.8838	3.57266	6.06855	0.324237
3	80.9542	73.6289	36.3824	2.10368		4	8.53374	7.72748	5.03089	0.865107
4	75.7325	64.5379	28.4748	1.69046		5	7.72259	2.32178	5.11148	0.0786635
5	72.0135	60.6123	22.8963	2.06612		6	10.3668	3.23227	6.52647	0.502312
6	71.2059	55.5973	16.266	2.68595
Data set 3
Time	Buffer	1nM	10nM	100nM
0	100	100	100	100
1	92.1405	86.4734	57.2464	8.56559
2	79.1342	84.2252	46.2096	4.10628
3	77.6477	77.8335	31.178	2.60126
4	68.2832	70.5686	23.8573	3.28874
5	64.7157	64.8829	17.4842	1.95095
6	55.0167	61.2783	14.4184	1.91379

## Sheet: Fig3e
Gly-(Ec)tRNA(Gly) wild type (U73)
MmDTD
Data set 1
Time (min)	Buffer	100 pM	1nM	10nM	100nM					Mean
0	100	100	100	100	100					Time	Buffer	100 pM	1nM	10nM	100nM
1	97.4505	48.42	20.9947	3.06492	1.83895					0	100	100	100	100	100
2	94.1349	39.66	8.62357	2.29869	2.10365					1	96.2753	68.4735	19.7116	3.01288	2.42405
3	92.0591	31.04	5.30789	2.38228	1.4628					2	93.3779	55.3704	16.1923	2.38697	2.35047
4	90.2062	26.38	2.99526	2.17331	1.44887					3	91.2454	44.2905	6.68975	2.36263	1.95166
5	86.8905	24.33	2.99526	1.86682	2.53553					4	87.625	35.768	4.57303	2.33072	1.75656
6	84.0067	25.4	3.32962	1.96434	2.34048					5	84.0484	30.2298	3.65091	1.99583	1.93353
										6	79.6462	28.8771	3.36292	2.25642	2.27269
Data set 2
Time (min)	Buffer	100 pM	1nM	10nM	100nM					Standard deviation
0	100	100	100	100	100					Time	Buffer	100 pM	1nM	10nM	100nM
1	96.9182	49.4	18.4762	2.6252	3.35283					0	0	0	0	0	0
2	93.3371	39.59	32.444	2.55386	2.59666					1	1.59693	1.73842	1.25991	0.364465	0.813356
3	90.0699	32	10.5864	2.668	2.69653					2	0.73741	1.05998	14.0854	0.144614	0.246506
4	87.8442	26.48	6.64859	2.08304	1.61221					3	1.04279	1.23718	3.4218	0.315649	0.655501
5	84.206	21.98	5.05065	2.0973	1.56941					4	2.69741	2.64439	1.87685	0.353719	0.399909
6	79.0983	18.72	3.96633	2.33985	2.63946					5	2.92407	4.34201	1.21302	0.117686	0.525154
										6	4.11401	5.74041	0.587464	0.260592	0.404945
Data set 3
Time	Buffer	100 pM	1nM	10nM	100nM
0	100	100	100	100	100
1	94.4571	47.36	19.6637	3.34853	2.08036
2	92.6617	38.16	7.50926	2.30835	2.3511
3	91.6073	30.86	4.17498	2.03762	1.69564
4	84.8247	23	4.07524	2.73582	2.20861
5	81.0487	17.85	2.90681	2.02337	1.69564
6	75.8336	17.22	2.79282	2.46509	1.83813

## Sheet: Fig3f
Gly-(Ec)tRNA(Gly)U73A
MmDTD
Data set 1						Mean
Time (min)	Buffer	1nM	10nM	100nM		Time (min)	Buffer	1nM	10nM	100nM
0	100	100	100	100		0	100	100	100	100
1	97.1003	94.7376	82.1111	36.3302		1	95.6951	94.7248	80.0322	55.2859
2	92.0835	89.6594	69.0089	20.8806		2	93.1024	90.796	74.1324	24.2822
3	87.849	87.7877	61.3225	13.2249		3	90.0455	85.518	66.2645	12.1876
4	84.6425	84.9494	53.3139	7.2108		4	86.7046	84.7505	58.73	7.92414
5	80.6689	77.2476	46.594	4.60264		5	83.9173	78.1185	51.408	5.24467
6	-	74.3173	39.1991	2.70021		6	80.4861	74.9718	45.9638	2.56317
						Standard deviation
Data set 2						Time (min)	Buffer	1nM	10nM	100nM
Time (min)	Buffer	1nM	10nM	100nM		0	0	0	0	0
0	100	100	100	100		1	1.90263	0.841519	5.8543	4.1228
1	93.53	95.5598	73.4221	29.5274		2	1.92892	1.79383	5.33973	3.21298
2	91.8966	92.8639	73.7234	15.0016		3	2.68523	2.19635	4.28374	3.00728
3	89.2483	85.3631	68.5538	7.64351		4	1.85822	0.567458	5.49667	1.99174
4	88.2493	84.1104	64.3038	4.18649		5	3.48538	0.826953	4.37455	0.724506
5	87.5991	78.8931	52.4897	3.18744		6	0.819614	0.925682	5.91443	0.999477
6	81.0657	75.6264	50.1586	1.36378
Data set 3
Time	Buffer	1nM	10nM	100nM
0	100	100	100	100
1	96.455	93.8769	84.5633	36.9642
2	95.3271	89.8646	79.6648	15.6945
3	93.039	83.4032	68.9172	12.3751
4	87.222	85.1917	58.5723	7.94393
5	83.4837	78.2146	55.1402	3.62552
6	79.9065	-	48.5337	3.31937
