# Supplementary material for: A discriminator code–based DTD surveillance ensures faithful glycine delivery for protein biosynthesis in bacteria
Source: eLife journal article supplement (doi:10.7554/elife.38232), 2018-08-09
Supplement: figures [file elife-38232-figures-v2.pdf]

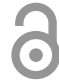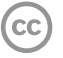

---

## Figures and figure supplements

A discriminator code–based DTD surveillance ensures faithful glycine delivery for protein biosynthesis in bacteria

**Santosh Kumar Kuncha *et al***

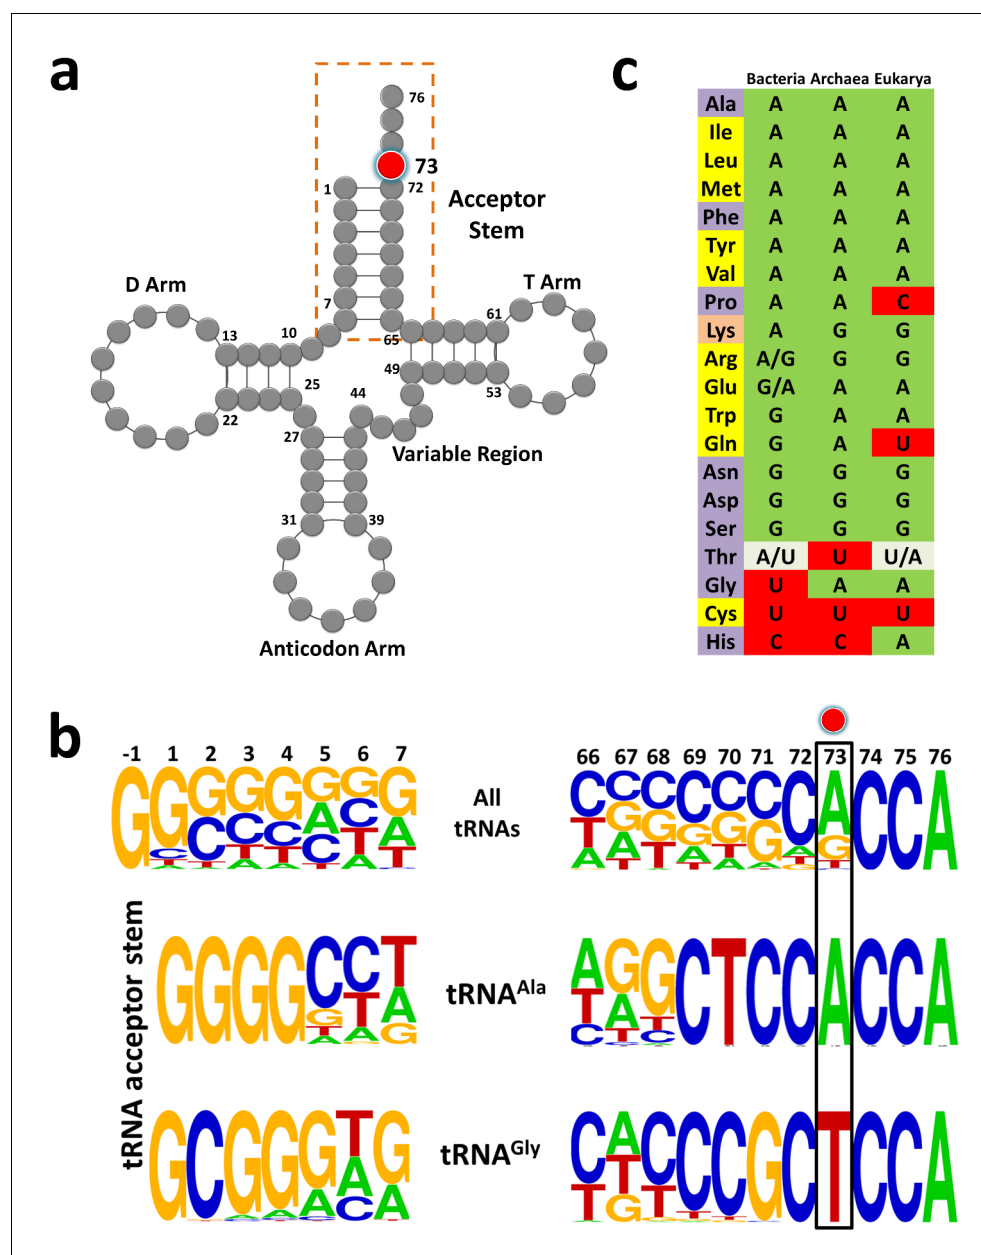

**Figure 1.** tRNA<sup>Gly</sup> and tRNA<sup>Ala</sup> show discriminator base dichotomy in Bacteria. (a) Clover leaf model of tRNA with the discriminator base highlighted in red. (b) Frequency distribution of tRNA acceptor stem elements across bacterial tRNAs, comparing and contrasting between tRNA<sup>Gly</sup> and tRNA<sup>Ala</sup>. Red circle indicates the discriminator base. (c) Distribution of the discriminator base in all tRNAs across the three domains of life. The instances where the discriminator base shows >90% conservation has been represented by the most frequent base. In the case of tRNA<sup>Thr</sup>, U73 and A73 together represent >90% frequency of occurrence; A/U in Bacteria implies A73 is more abundant than U73, whereas U/A in Eukarya denotes U73 is more abundant than A73. Amino acids are color-coded on the basis of the class to which the corresponding synthetases belong: yellow, class I; blue, class II; orange, both class I and II. Discriminator base color-coded as follows: green, purine (A or G); red, pyrimidine (U or C); grey, purine and pyrimidine (A/U or U/A).

DOI: <https://doi.org/10.7554/eLife.38232.002>

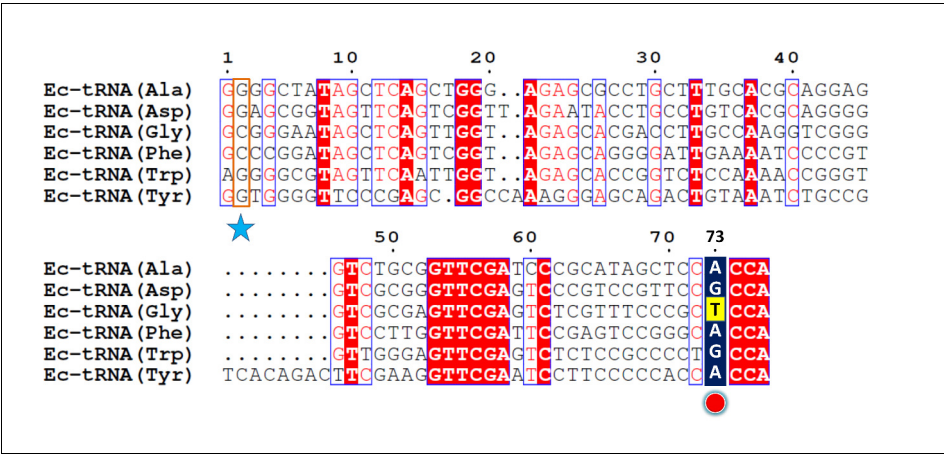

**Figure 1—figure supplement 1.** Multiple sequence alignment of a few *E. coli* tRNAs. The second position is highlighted with a blue star while the discriminator base is marked with a red circle.  
DOI: <https://doi.org/10.7554/eLife.38232.003>

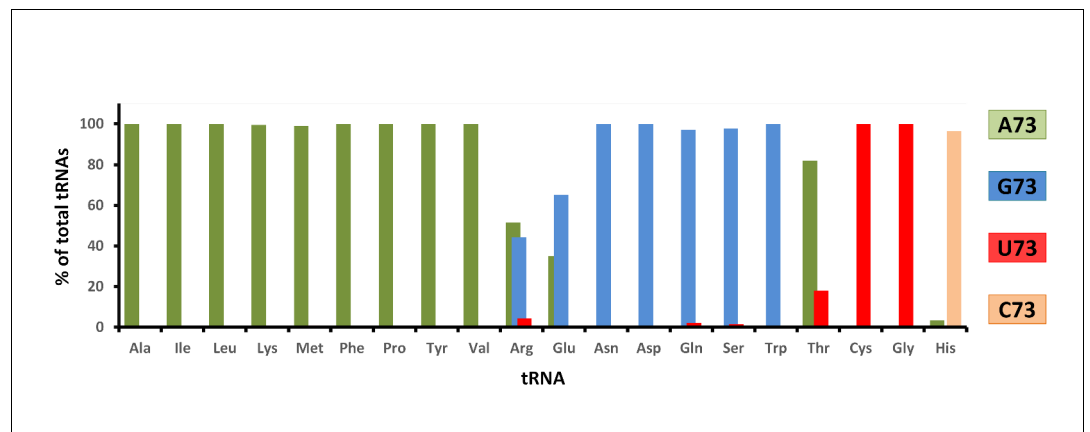

**Figure 1—figure supplement 2.** Graph showing percentage distribution of the discriminator base in all tRNAs across all bacteria.

DOI: <https://doi.org/10.7554/eLife.38232.004>

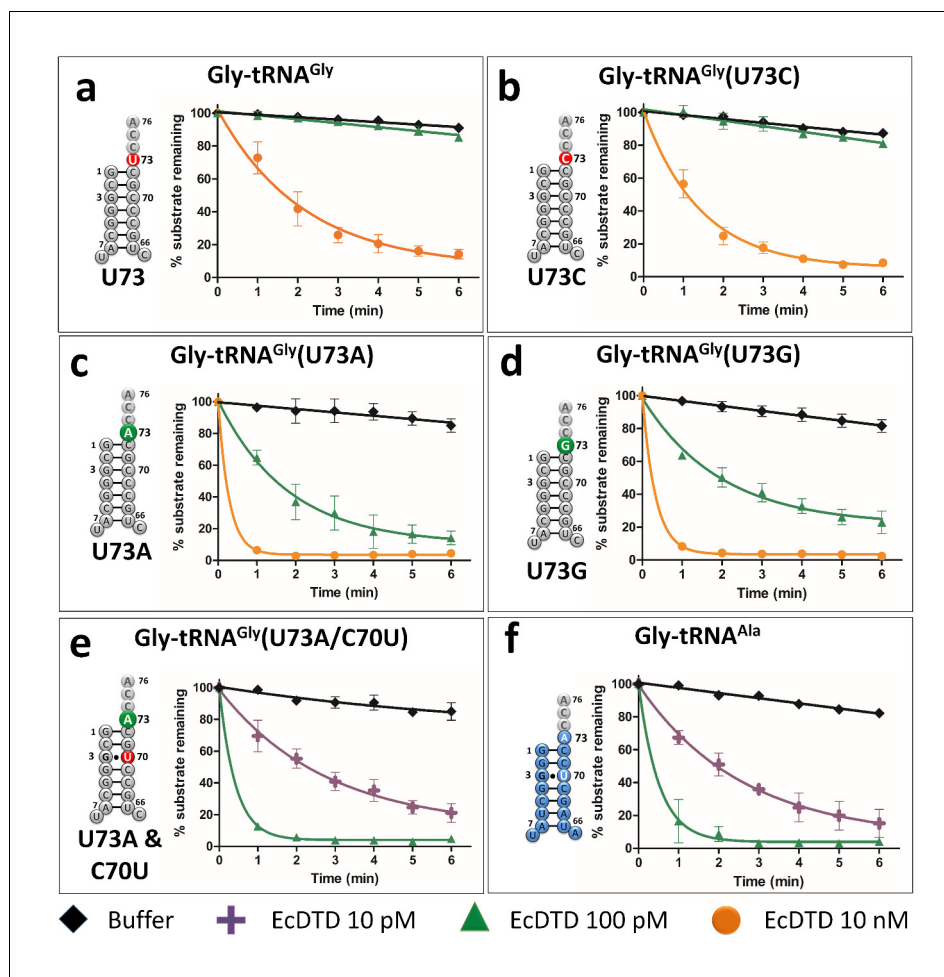

**Figure 2.** Discriminator base modulates DTD's activity. (a–e) Deacylation of Gly-tRNA<sup>Gly</sup> and its mutants by various concentrations of EcDTD. (f) Deacylation of Gly-tRNA<sup>Ala</sup> by various concentrations of EcDTD. Lines indicate exponential decay fits and error bars represent one standard deviation from the mean of at least three independent readings.

DOI: <https://doi.org/10.7554/eLife.38232.006>

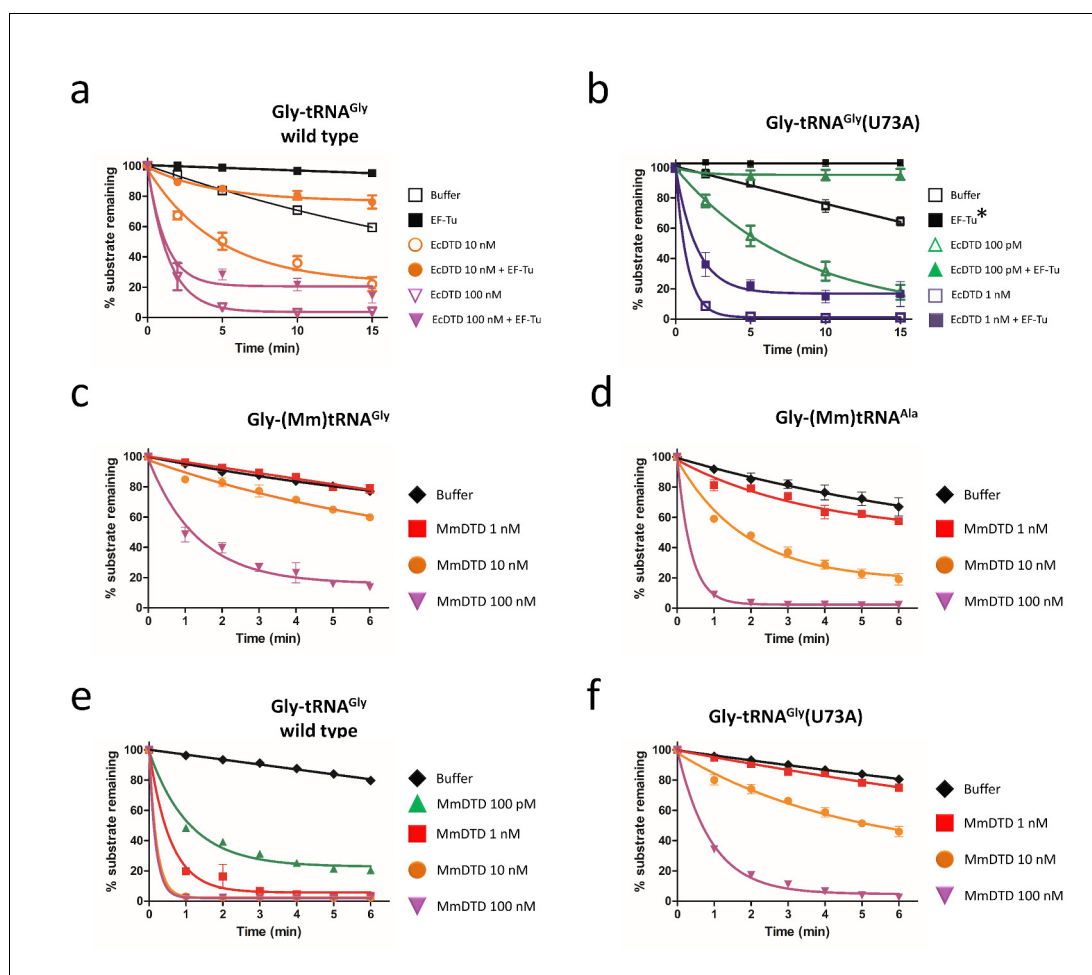

**Figure 3.** Discriminator base predominantly determines the fate of the substrate. Deacylation of (a) Gly-tRNA<sup>Gly</sup> and (b) Gly-tRNA<sup>Gly</sup>(U73A) by EcDTD in the presence or absence of EF-Tu (\* indicates the data points are connected through line). Deacylation of (c) Gly-(Mm)tRNA<sup>Gly</sup> and (d) Gly-(Mm)tRNA<sup>Ala</sup> by various concentrations of MmDTD. Deacylation of (e) Gly-tRNA<sup>Gly</sup> and (f) Gly-tRNA<sup>Gly</sup>(U73A) by various concentrations of MmDTD. Lines indicate exponential decay fit and error bars represent one standard deviation from the mean of at least three independent readings.

DOI: <https://doi.org/10.7554/eLife.38232.008>

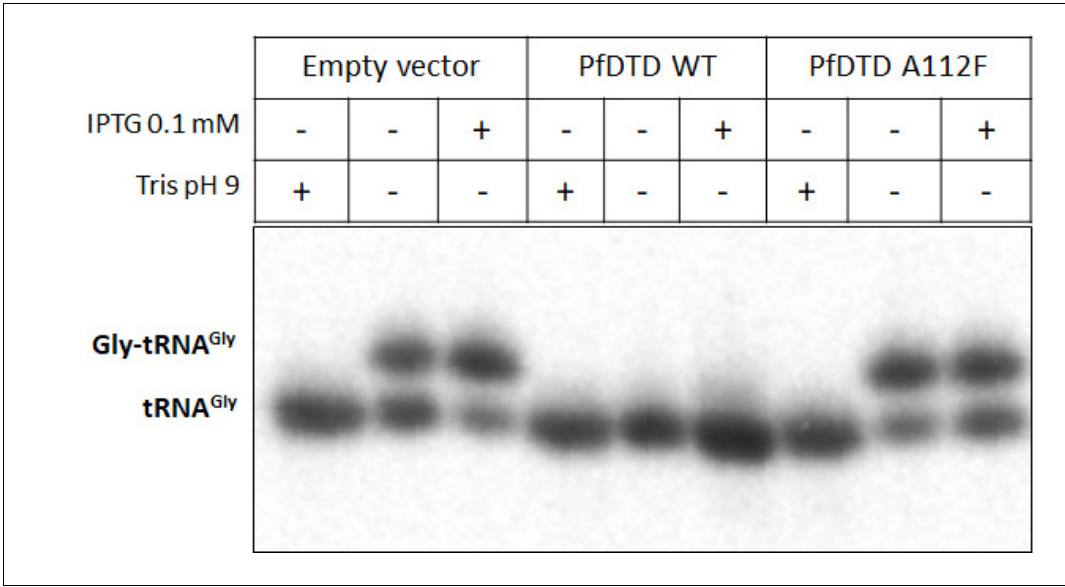

**Figure 3—figure supplement 1.** Northern blotting showing PfDTD overexpression using IPTG leads to depletion of Gly-tRNA<sup>Gly</sup> while the inactive mutant of PfDTD (A112F) has no effect. Tris pH nine is used as deacylation control.

DOI: <https://doi.org/10.7554/eLife.38232.009>

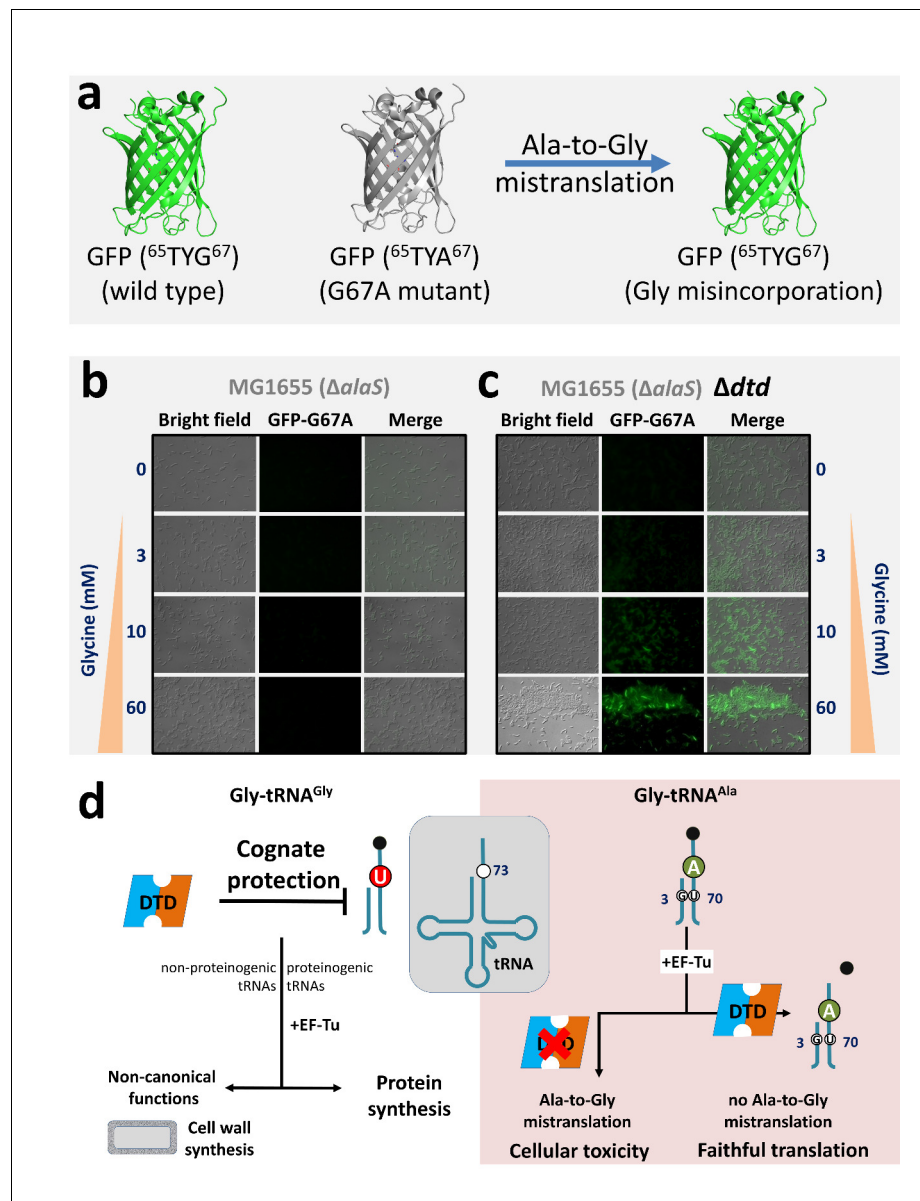

**Figure 4.** DTD avoids glycine misincorporation into proteins. (a) GFP-based fluorescence reporter assay for visualizing alanine-to-glycine mistranslation, wherein the mutant GFP G67A (<sup>65</sup>TYA<sup>67</sup>) will fluoresce only when TYA is mistranslated to TYG. Microscopy images showing GFP fluorescence in *E. coli* at different concentrations of glycine supplementation (b) in the presence and (c) in the absence of DTD. The *E. coli* strain used is MG1655 with editing-defective AlaRS gene (i.e.  $\Delta alaS$ ) (Pawar et al., 2017). (d) Model showing N73 dichotomy in bacterial tRNA<sup>Gly</sup> and tRNA<sup>Ala</sup>, enabling protection of the cognate Gly-tRNA<sup>Gly</sup> (both proteinogenic and non-proteinogenic) predominantly by U73, while effecting efficient removal of the non-cognate Gly-tRNA<sup>Ala</sup> (having A73 and G3•U70) to prevent alanine-to-glycine mistranslation.

DOI: <https://doi.org/10.7554/eLife.38232.011>
